# Supplementary material
Source: PubMed Central journal article supplement (PMC10269045)
Supplement: aac.01531-22-s0001.pdf [file aac.01531-22-s0001.pdf]

1           **Cryo-EM structure of the *Mycobacterium tuberculosis* cytochrome *bcc:aa<sub>3</sub>***  
2           **supercomplex and a novel inhibitor targeting subunit cytochrome *cI***

3   Vikneswaran Mathiyazakan<sup>1,2</sup>, Chui-Fann Wong<sup>2</sup>, Amaravadhi Harikishore<sup>2</sup>, Kevin Pethe<sup>1,2,\*</sup>  
4   and Gerhard Grüber<sup>2,\*</sup>

5  
6   <sup>1</sup> Lee Kong Chian School of Medicine, Nanyang Technological University, 59 Nanyang Drive,  
7   Singapore 636921, Republic of Singapore, Singapore

8   <sup>2</sup> Nanyang Technological University, School of Biological Sciences, 60 Nanyang Drive,  
9   Singapore 637551, Republic of Singapore

10  
11   \*To whom correspondence should be addressed:

12   Prof. Dr. Kevin Pethe, E-mail: [kevin.pethe@ntu.edu.sg](mailto:kevin.pethe@ntu.edu.sg)

13   Prof. Dr. Gerhard Grüber, E-mail: [ggrueber@ntu.edu.sg](mailto:ggrueber@ntu.edu.sg)

14  
15   Running title: Mycobacterial cytochrome oxidase, an inhibitor target

16  
17   **Keywords:** Cytochrome *bcc:aa<sub>3</sub>* oxidase • Bioenergetics • OXPHOS • Tuberculosis •  
18   *Mycobacterium tuberculosis* • Inhibitor

19  
20  
21  
22  
23  
24  
25

## 26 **Supplementary Methods**

### 27 **Cryo-EM grid preparation**

28 The purified *Mtb* *cyt-bcc:aa3* was concentrated to 9 mg/ml with a 100 kDa centricon  
29 (Millipore; Burlington, WA, USA). 4  $\mu$ l of sample were applied to a holey carbon grid  
30 (Quantifoil® 300 mesh R1.2/1.3 holey carbon grid; Quantifoil Micro Tools GmbH, Germany)  
31 that was glow-discharged in air for 1 min. Grids were blotted twice with the FEI Vitrobot  
32 (ThermoFisher Scientific; Waltham, MA, USA) for 3.5 s at 4 °C and 100% humidity before  
33 plunge-freezing in liquid ethane.

34

### 35 **Data collection**

36 Cryo-EM images of the *Mtb* *cyt-bcc:aa3* were recorded with a FEI Titan 300 kV TEM  
37 electron microscope (ThermoFisher Scientific; Waltham, MA, USA) equipped with a Gatan  
38 K2 direct electron detector (Gatan; Pleasanton, CA, USA). Data collection was performed  
39 automatically with the in-built EPU software. 4,635 super-resolution movies with 40 exposure  
40 frames were recorded at a magnification of 130,000  $\times$ , yielding a pixel size of 0.53 Å/pixel.  
41 The camera exposure rate and total exposure were 6.6  $e^-$  per pixel per second and 40  $e^-$  per Å<sup>2</sup>.

42

### 43 **Image analysis**

44 Image analysis for the *Mtb* *cyt-bcc:aa3* was performed with CryoSPARC and RELION  
45 v3.1.<sup>1,2</sup> MotionCor2 was used to correct local beam-induced motion and alignment of frames  
46 with a 5 x 5 patches.<sup>3</sup> Defocus and astigmatism were estimated with CTFFIND4.<sup>4</sup> An  
47 automated particle picking was performed which resulted in 206,495 particles. The particles  
48 were binned by a factor of two and subjected to multiple rounds of 2D- and 3D classifications,  
49 producing a final dataset of 73,909 particles. Next, particles were re-extracted at full resolution  
50 and subjected to 3D non-uniform refinement. The final map was post-processed with a soft-

51 edge mask, yielding a resolution of 4.63 Å. The map was then transferred to RELION v3.1 to  
52 utilize the Bayesian polishing function to improve the resolution further. This resulted in a final  
53 map with a resolution of 4.52 Å which was then used for model building.

54

## 55 **Model building and refinement**

56 The cryo-EM structure of the hybrid *Mtb* cyt-*bcc* and *M. smegmatis* cyt-*aa3* (PDB 7E1V)<sup>5</sup>  
57 was rigidly fitted into the density maps using UCSF ChimeraX.<sup>6</sup> Model of *M.tb* cyt-*bcc:aa3*  
58 was built from the EM maps with Coot and Phenix.<sup>7, 8</sup> Manual adjustments and refinements  
59 were performed using Coot and further real-space refinements were performed in Phenix.<sup>7, 8</sup>  
60 Multiple cycles of refinements were performed to optimize the models. The quality of the final  
61 models was evaluated with MolProbity.<sup>7-9</sup> Visualizations, generation of figures and/or movies  
62 were performed with UCSF ChimeraX, UCSF Chimera, and open-sourced PyMOL v2.4  
63 (Schrödinger 2017; New York, USA).<sup>5,10,11</sup>

64

## 65 **Homology modelling**

66 The *Mycobacterium tuberculosis* (*Mtb*) QcrC model was generated using homology  
67 modelling online tool - SWISS-MODEL server. The 3D model of the *Mtb* QcrC was generated  
68 using the *M. smegmatis* cryo-EM structure (PDB ID: 6HWH, resolved at 3.4 Å) as a template.  
69 The heme groups were modelled in to the *Mtb* QcrC complex based on the *M. smegmatis*  
70 structure. The quality of the homology model was evaluated using procheck algorithm.<sup>12,13</sup>

71

## 72 **Protein Preparation**

73 The *Mtb* QcrA/C subunit assembly model was prepared by fixing the bond orders of  
74 the cofactors—porphyrin rings, heme atoms and the ligated histidine residues. The substrate  
75 (MQ9) and other heteroatoms other than Co-factors of QcrA/C molecules were removed during

76 the refine step of protein preparation. The refined protein was energy minimized until the heavy  
77 atoms converged to 0.3 Å r.m.s.d. using OPLS force field in protein preparation wizard and  
78 Macromodel modules in Schrödinger suite of programs.<sup>14,15</sup>

79

### 80 **Ligand preparation**

81 Enamine discovery collection of more than two million molecules was employed for virtual  
82 screening studies. Using default settings with ligand preparation and energy minimization  
83 tools, the 2D library was converted into 3D and energy minimized.

84

### 85 **Grid preparation and docking**

86 The mycobacterial specific  $\alpha$ 3-helix was used to define the site point for grid generation using  
87 default settings in glide. The Enamine 3D library was run through high-throughput virtual  
88 screening (HTVS) mode, the standard precision (SP) mode, and extra precision (XP) mode  
89 using default settings. The hits thus characterized were also further assessed for their fitness by  
90 docking into the experimentally determined *Mtb* QcrAC subunits of *cyt-bcc* cryo-EM structure  
91 from this study. All molecular modelling simulations were performed on a Linux workstation.

92

### 93 **DMNQH<sub>2</sub> reaction kinetics assay**

94 2,3-Dimethyl-1,4-naphthoquinone (DMNHQ) was purchased from Enamine, USA. 20 mM  
95 of DMNQ was prepared in 1 ml ethanol containing 6 mM HCl. The DMNQ solution was  
96 reduced with a few grains of sodium borohydride (NaBH<sub>4</sub>) in an ice bath. 10  $\mu$ l of 12 N HCl  
97 was used to quench the reaction. This reaction resulted in the formation of DMNQH<sub>2</sub>.

98 Purified *Mtb* *cyt-bcc:aa<sub>3</sub>* was resuspended in 500  $\mu$ l reaction buffer (20 mM MOPS, pH 7.4,  
99 100 mM NaCl, 0.01% DDM) to a final concentration of 65 nM. DMNQH<sub>2</sub> was serially diluted  
100 from a starting concentration of 200  $\mu$ M and used to initiate respiration respectively. This

101 initiated respiration within the supercomplex, was monitored by a Clark-type oxygen electrode  
102 (Oxytherm<sup>+</sup>, Hansatech, Pentney, United Kingdom). The oxygen consumption curve was  
103 plotted using GraphPad Prime 8.0 software.<sup>16</sup>

104

#### 105 **cyt*MycC*I inhibitor kinetics assay**

106 2,3-Dimethyl-1,4-naphthoquinone and cyt*MycC*I were purchased from Enamine, USA. 20  
107 mM of DMNQ was prepared in 1 ml ethanol containing 6 mM HCl. The DMNQ solution was  
108 reduced with a few grains of sodium borohydride (NaBH<sub>4</sub>) in an ice bath. 10 µl of 12 N HCl  
109 was used to quench the reaction. This reaction resulted in the formation of DMNQH<sub>2</sub>.

110 Purified *Mtb* cyt-*bcc:aa3* was resuspended in 500 µl reaction buffer (20 mM MOPS, pH 7.4,  
111 100 mM NaCl, 0.01% DDM) to a final concentration of 65 nM. cyt*MycC*I was serially diluted  
112 from a starting concentration of 250 µM and incubated with the resuspended supercomplex  
113 respectively at 4 °C for 1 hour. 5 µl of DMNQH<sub>2</sub> was added to the mixture to yield a final  
114 concentration of 100 µM. This initiated respiration within the supercomplex, was monitored  
115 by a Clark-type oxygen electrode (Oxytherm<sup>+</sup>, Hansatech). The oxygen consumption curve  
116 was plotted using GraphPad Prime 8.0 software.<sup>16</sup>

117

#### 118 **References**

- 119 1. Punjani A, Rubinstein JL, Fleet DJ, Brubaker MA. 2017. cryoSPARC: algorithms for  
120 rapid unsupervised cryo-EM structure determination. *Nature Methods* 14:290-296.
- 121 2. Zivanov J, Nakane T, Forsberg BO, Kimanius D, Hagen WJH, Lindahl E, Scheres  
122 SHW. 2018. New tools for automated high-resolution cryo-EM structure determination  
123 in RELION-3. *eLife* 7:e42166.

- 124 3. Zheng SQ, Palovcak E, Armache JP, Verba KA, Cheng Y, Agard DA. 2017.  
125 MotionCor2: anisotropic correction of beam-induced motion for improved cryo-  
126 electron microscopy. *Nature Methods* 14:331-332.
- 127 4. Rohou A, Grigorieff N. 2015. CTFFIND4: Fast and accurate defocus estimation from  
128 electron micrographs. *Journal of Structural Biology* 192:216-21.
- 129 5. Zhou S, Wang W, Zhou X, Zhang Y, Lai Y, Tang Y, Xu J, Li D, Lin J, Yang X, Ran  
130 T, Chen H, Guddat LW, Wang Q, Gao Y, Rao Z, Gong H. 2021. Structure of  
131 *Mycobacterium tuberculosis* cytochrome bcc in complex with Q203 and TB47, two  
132 anti-TB drug candidates. *eLife* 10:e69418.
- 133 6. Goddard TD, Huang CC, Meng EC, Pettersen EF, Couch GS, Morris JH, Ferrin TE.  
134 2018. UCSF ChimeraX: Meeting modern challenges in visualization and analysis.  
135 *Protein Science* 27:14-25.
- 136 7. Afonine PV, Poon BK, Read RJ, Sobolev OV, Terwilliger TC, Urzhumtsev A, Adams  
137 PD. 2018. Real-space refinement in PHENIX for cryo-EM and crystallography. *Acta*  
138 *crystallographica. Section D, biological crystallography* 74:531-544.
- 139 8. Emsley P, Lohkamp B, Scott WG, Cowtan K. 2010. Features and development of Coot.  
140 *Acta crystallographica. Section D, biological crystallography* 66:486-501.
- 141 9. Williams CJ, Headd JJ, Moriarty NW, Prisant MG, Videau LL, Deis LN, Verma V,  
142 Keedy DA, Hintze BJ, Chen VB, Jain S, Lewis SM, Arendall WB, 3rd, Snoeyink J,  
143 Adams PD, Lovell SC, Richardson JS, Richardson DC. 2018. MolProbity: More and  
144 better reference data for improved all-atom structure validation. *Protein Science*  
145 27:293-315.
- 146 10. Pettersen EF, Goddard TD, Huang CC, Couch GS, Greenblatt DM, Meng EC, Ferrin  
147 TE. 2004. UCSF Chimera—A visualization system for exploratory research and  
148 analysis. *Journal of Computational Chemistry* 25:1605-1612.

- 149 11. Schrödinger Release 2019-2 (2019) Maestro, Force Fields, MacroModel, prime, protein  
150 preparation wizard, Ligprep, ConfGen, Phase, QikProp, Glide. Schrödinger, LLC, New  
151 York, NY
- 152 12. Laskowski RA, Rullmann JAC, MacArthur MW, Kaptein R, Thornton JM: AQUA and  
153 PROCHECK-NMR: programs for checking the quality of protein structures solved by  
154 NMR. *Journal of biomolecular NMR* 1996, 8(4):477-486.
- 155 13. Sasisekharan RGRC: Stereochemistry of polypeptide chain configurations *J Mol Biol*  
156 79599. Ramachandran GN, Ramakrishnan C, and Sasisekharan (1963).  
157 Stereochemistry of polypeptide chain configurations. *Journal of molecular biology*  
158 1963, 7:95-99.
- 159 14. Madhavi Sastry G, Adzhigirey M, Day T, Annabhimoju R, Sherman W: Protein and  
160 ligand preparation: parameters, protocols, and influence on virtual screening  
161 enrichments. *Journal of computer-aided molecular design* 2013, 27(3):221-234.
- 162 15. Schrödinger Release 2019-2 (2019) Maestro, Force Fields, MacroModel, prime, protein  
163 preparation wizard, Ligprep, ConfGen, Phase, QikProp, Glide. Schrödinger, LLC, New  
164 York, NY
- 165 16. Motulsky, H.; Christopoulos, A. *Fitting Models to Biological Data Using Linear and*  
166 *Nonlinear Regression: A Practical Guide to Curve Fitting*; GraphPad Software Inc.: San  
167 Diego, CA, USA, 2003; Available online: [www.graphpad.com](http://www.graphpad.com) (accessed on 21  
168 September 2021).
- 169

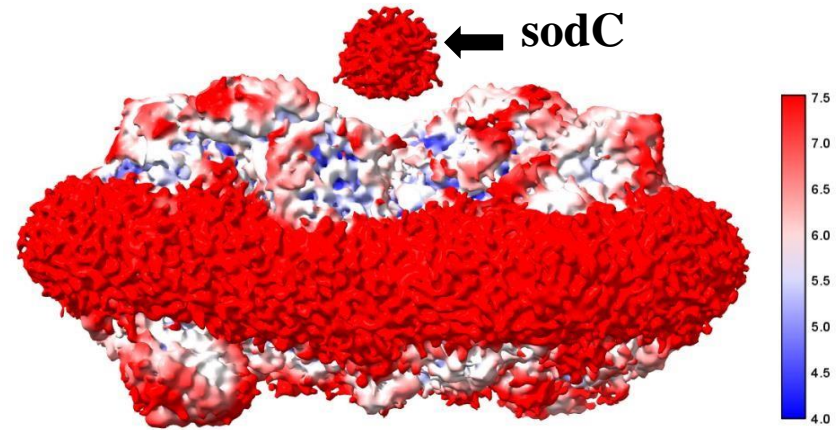

**Supplementary Figure S1.** Local resolution estimation of *Mtb* sodC. The dark red regions indicate a 7.5 Å resolution while the dark blue region denotes a 4 Å resolution. sodC was shown to have a high resolution of 7.5 Å.



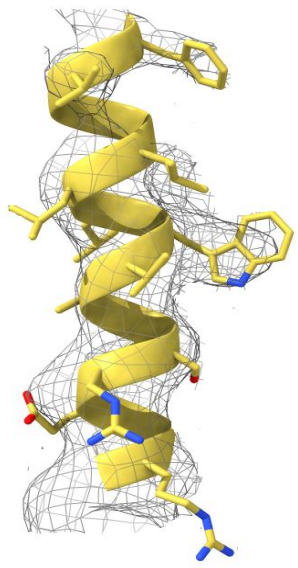

**QcrA**<sub>91-106</sub>

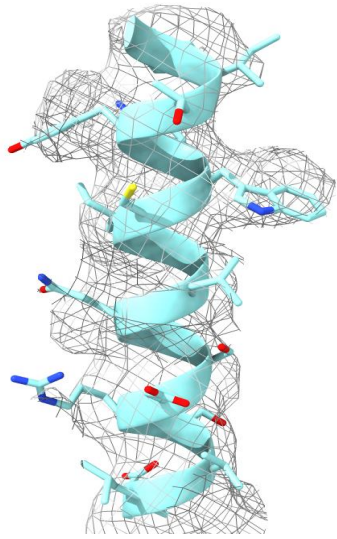

**QcrB**<sub>429-447</sub>

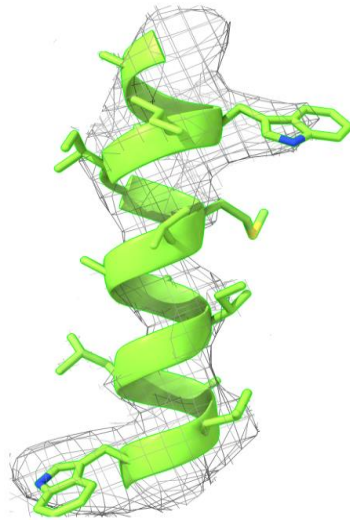

**QcrC**<sub>260-275</sub>

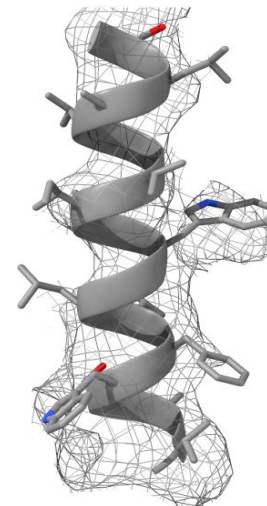

**CtaC**<sub>57-73</sub>

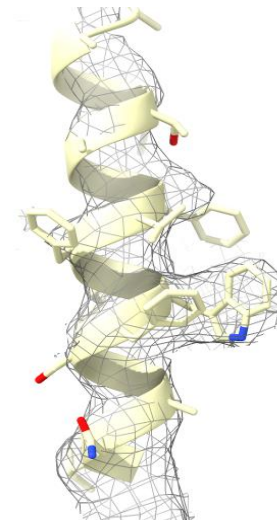

**CtaD**<sub>121-140</sub>

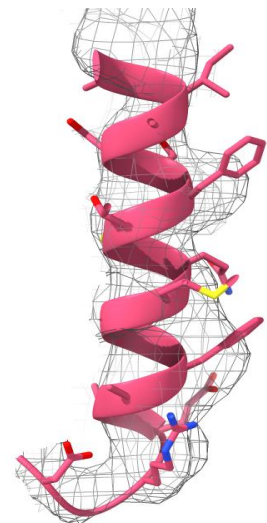

**CtaE**<sub>77-95</sub>

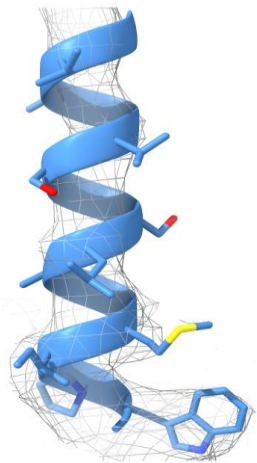

**CtaF**<sub>91-105</sub>

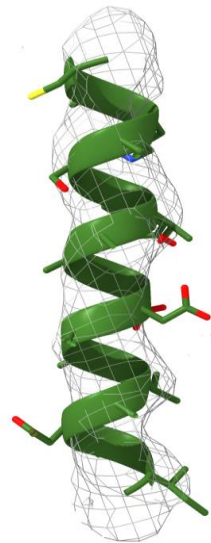

**CtaI**<sub>45-62</sub>

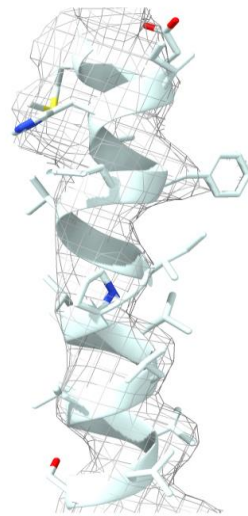

**CtaJ**<sub>4-22</sub>

**Supplementary Figure S2.** Cryo-EM map and model fit analysis of individual subunit backbone and side chain residues of the *Mtb* *cyt-bcc:aa<sub>3</sub>* structure.

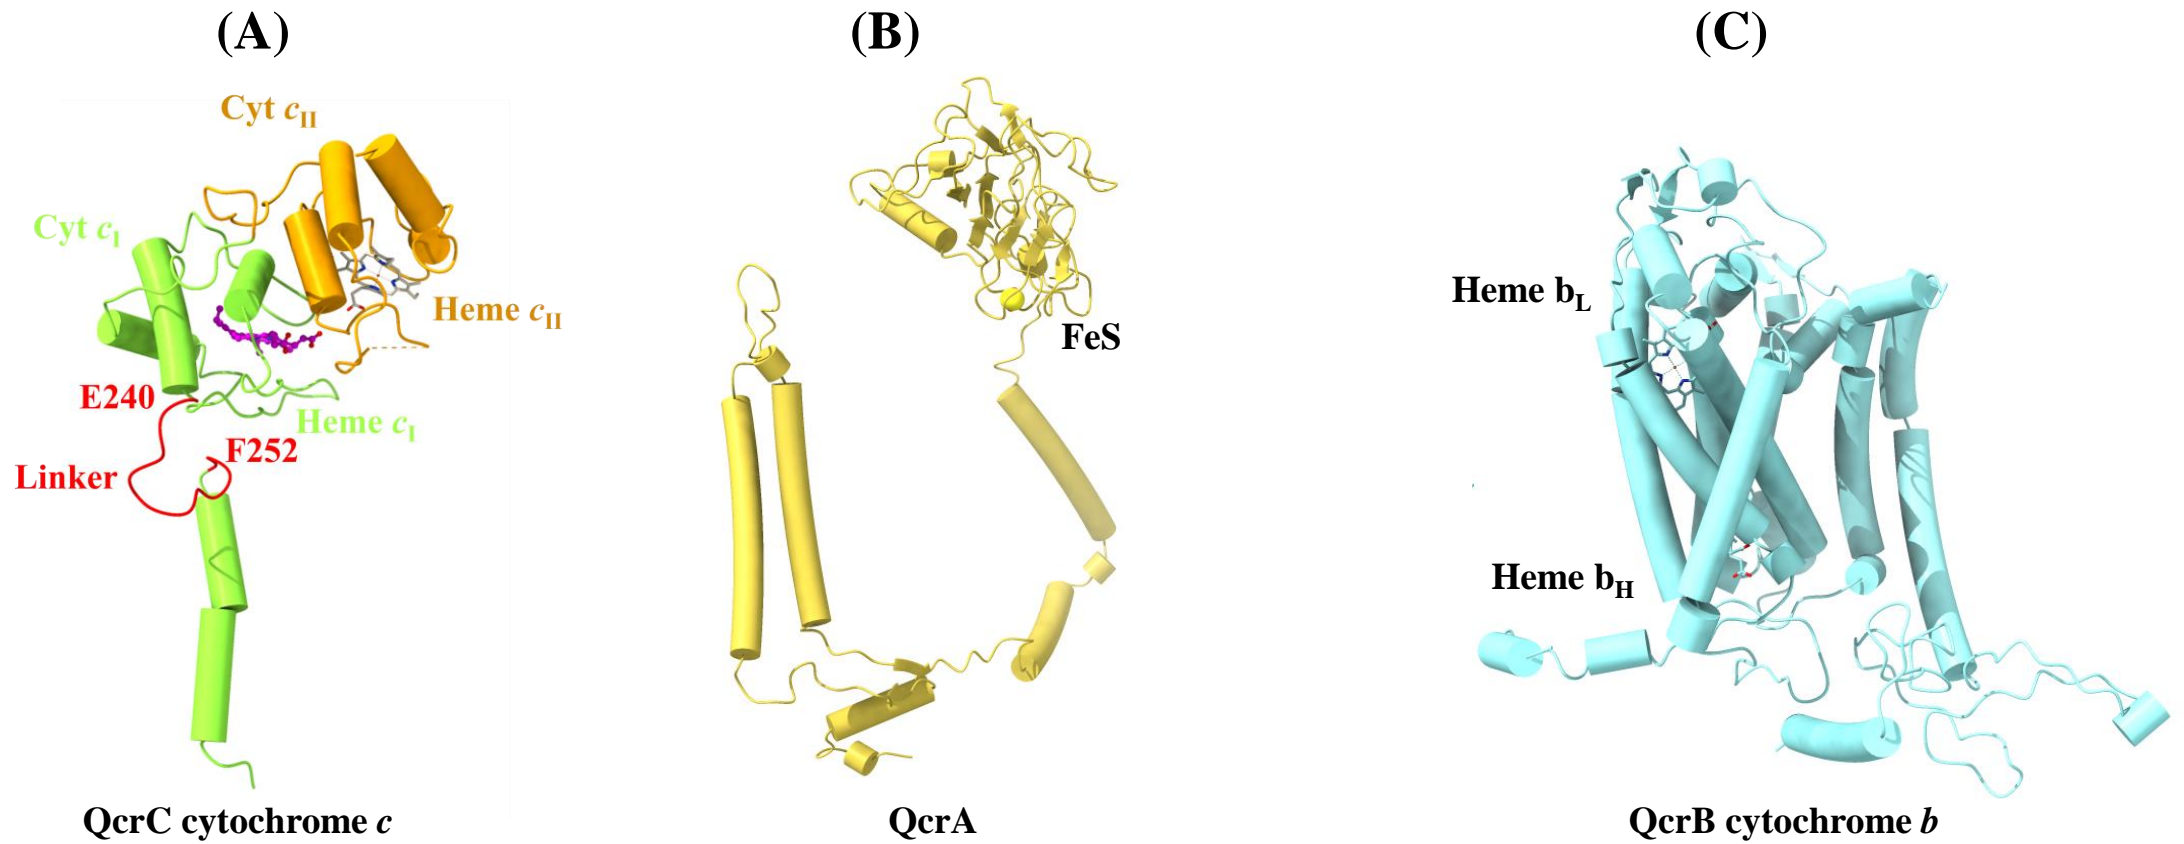

**Supplementary Figure S2A.** Structures of the resolved *Mtb* cyt-*bcc* subunits. The cyt-*bcc* complex consists of subunits QcrC (A), QcrA (B) and QcrB (C).

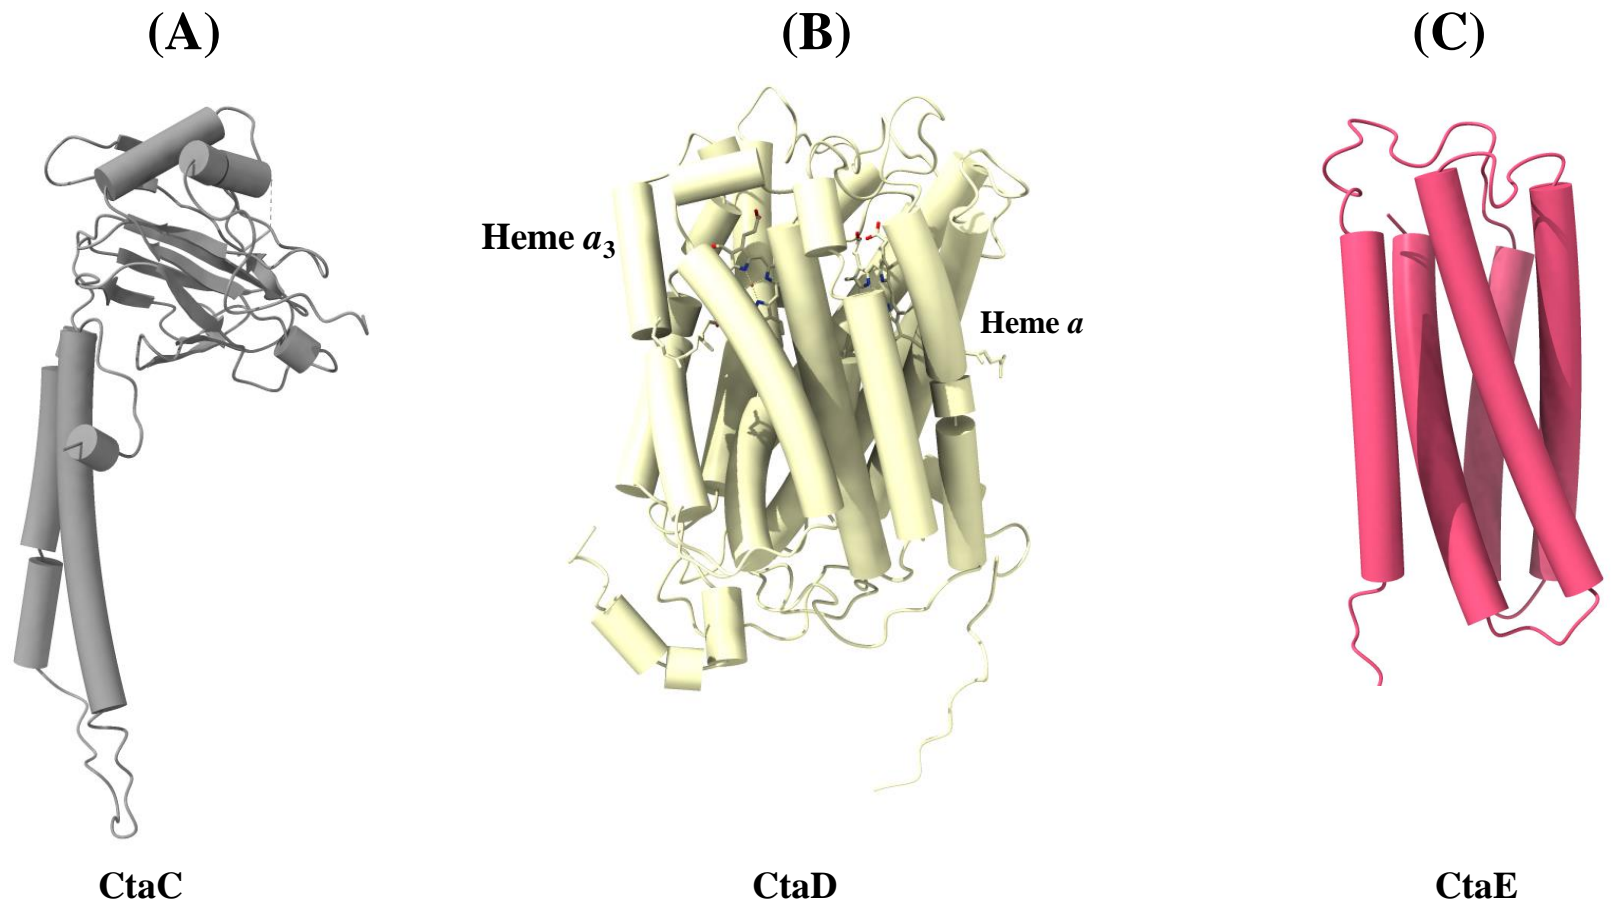

**Supplementary Figure S2B.** Derived structures of the *Mtb* *cyt-aa*<sub>3</sub> subunits CtaC (A), CtaD (B) and CtaE (C).

**(A)**

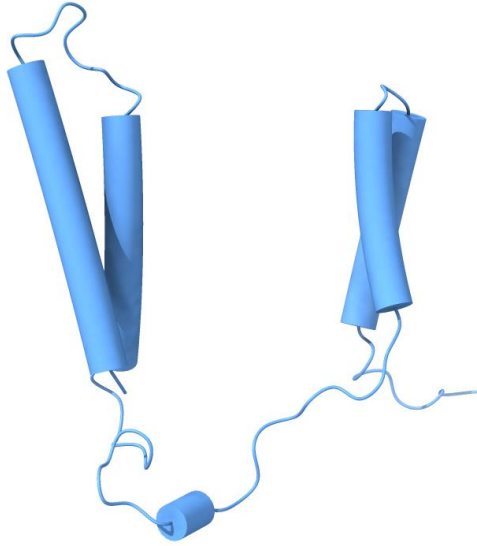

**CtaF**

**(B)**

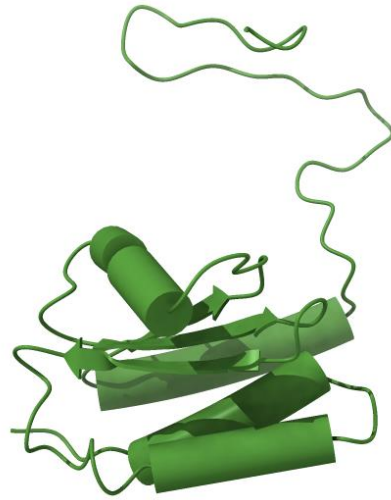

**CtaI**

**(C)**

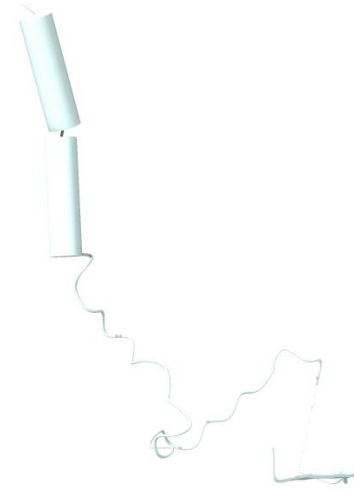

**CtaJ**

**Supplementary Figure S2C.** Structures of the *Mtb* *cyt-aa<sub>3</sub>* assembly subunits CtaF (A), CtaI (B) and CtaJ (C).

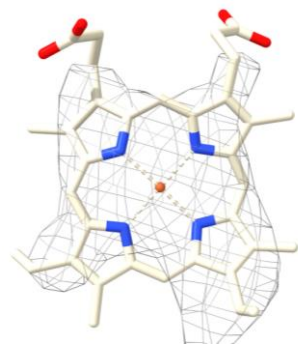

**Heme  $b_H$**

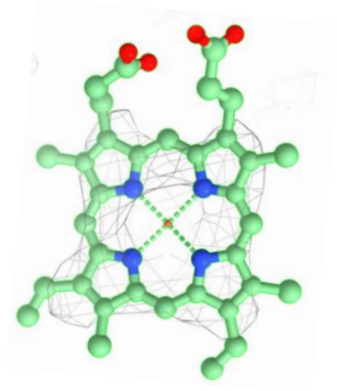

**Heme  $b_L$**

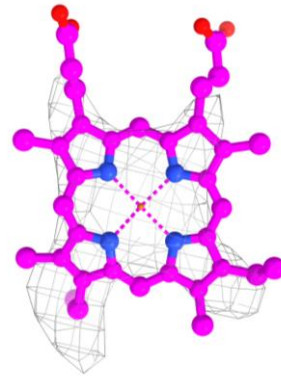

**Heme  $c_I$**

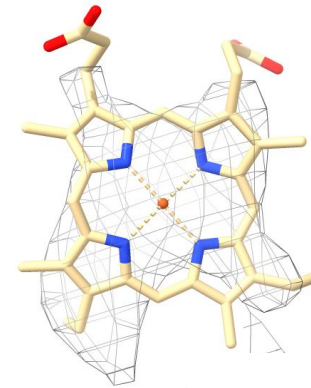

**Heme  $c_{II}$**

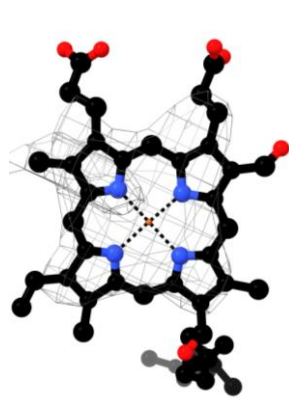

**Heme  $a$**

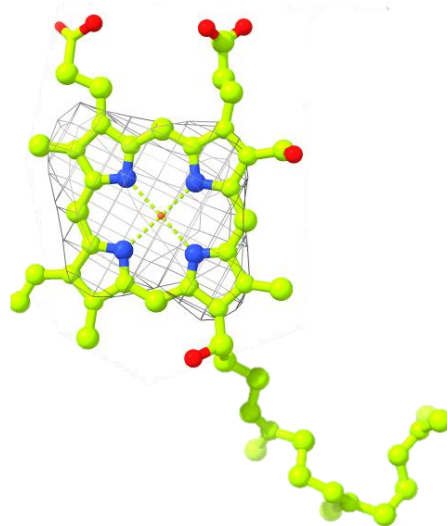

**Heme  $a_3$**

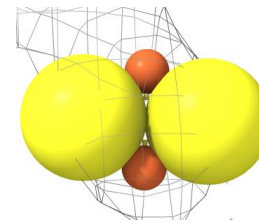

**FeS**

**Supplementary Figure 3.** Cryo-EM map and model fit analysis of reaction centers in resolved *Mtb* *cyt-bcc:aa<sub>3</sub>* structure.

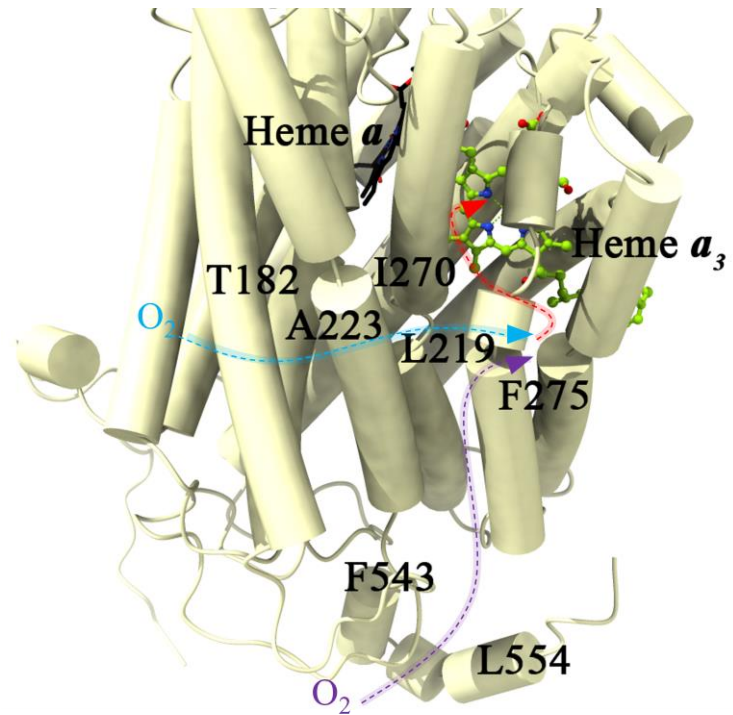

**Supplementary Figure 4.** Proposed oxygen diffusion pathway in the *Mtb* *cyt-bcc:aa<sub>3</sub>*. The diffusion of oxygen to heme *a<sub>3</sub>* has a Y-shaped channel, including two entry points. The first entrance is flanked by A223 and L219 (*blue*) and the second one is flanked by F543 and L554 (*purple*). The two channels converge at F275 to continue to I270 via the *red* channel and finally reach heme *a<sub>3</sub>*.

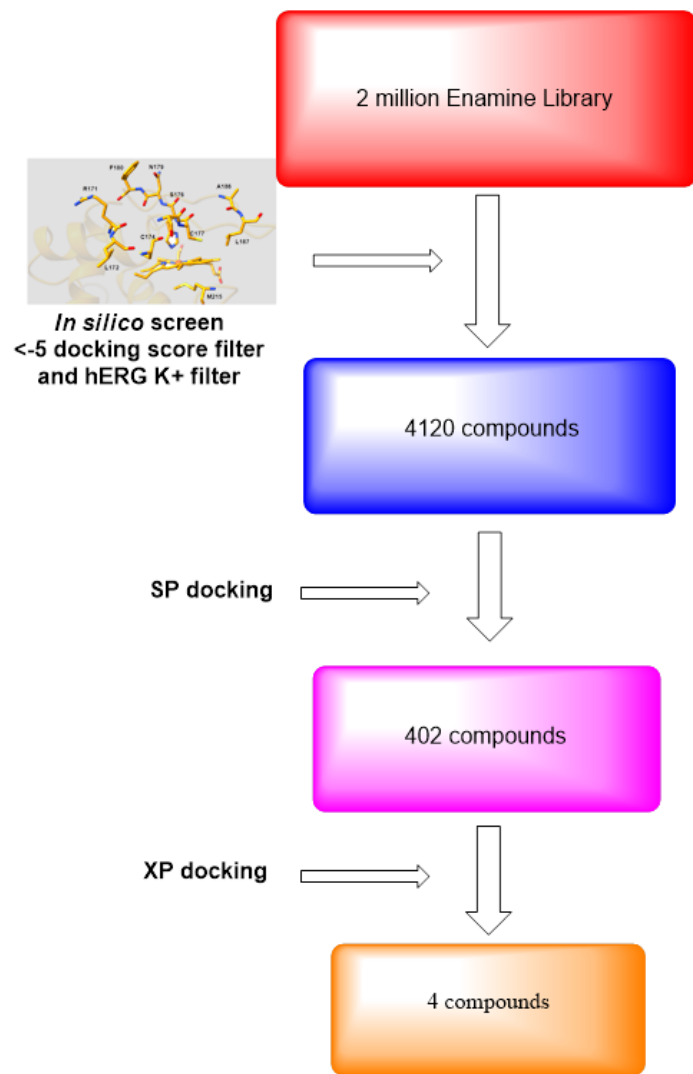

**Supplementary Figure 5.** A virtual screening campaign to identify novel chemical entities.

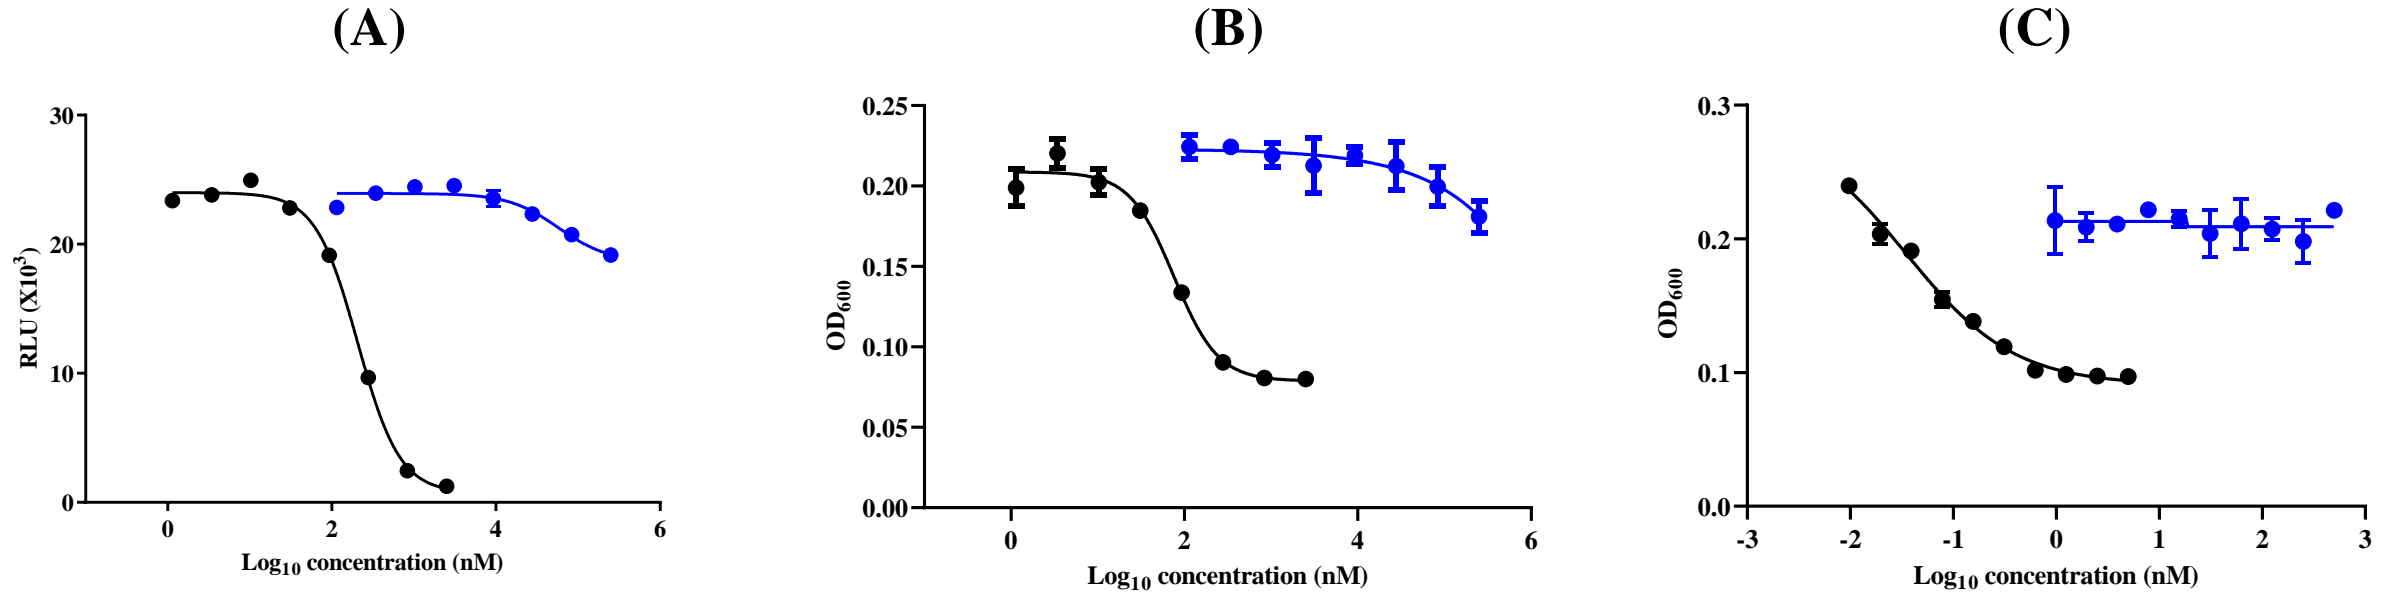

**Supplementary Figure 6.** Activity of *cytMycc1* whole cell assays (A) Effect of *cytMycc1* (blue circles) on the intracellular ATP levels in *M. bovis* BCG wildtype (WT) strain. The bacteria were treated with a dose-range of *cytMycc1* and bedaquiline (BDQ; black circles) for 15 hours before quantification of intracellular ATP levels. All experiments were performed in triplicate and repeated at least once. The data are expressed as the mean  $\pm$  SDs of triplicates for each condition. (B) Growth inhibitory activity of *cytMycc1* (blue circles) against WT *M. bovis* BCG. The bacteria were treated with a dose-range of *cytMycc1* and BDQ (black circles) for 5 days before growth inhibitory potency of the compounds were recorded. All experiments were performed in triplicate and repeated at least once. The data are expressed as the mean  $\pm$  SDs of triplicates for each condition. (C) Growth inhibitory activity of *cytMycc1* (blue circles) against WT *M. smegmatis*. The bacteria were treated with a dose-range of *cytMycc1* and BDQ (black circles) for 48 hours before growth inhibitory potency of the compounds were recorded. All experiments were performed in triplicates and repeated at least once. The data are expressed as the mean  $\pm$  SDs of triplicates for each condition.



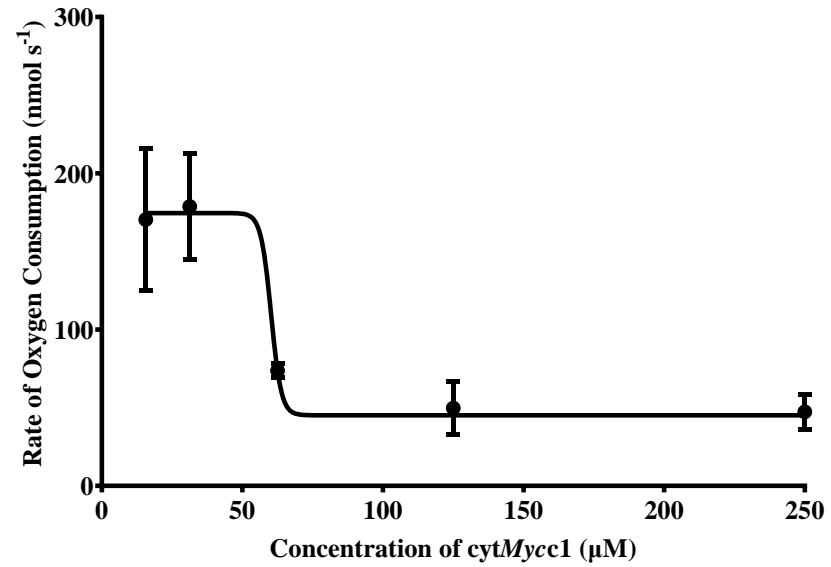

**Supplementary Figure 7.** Reaction kinetics of *cytMycc1* against *Mtb cyt-bcc:aa<sub>3</sub>* in an oxygen consumption assay. The recombinant protein was incubated with a dose-range of *cytMycc1* (black circles) for 1 hour before determining the effect on oxygen reduction in the presence of 100 μM of 2,3-dimethyl[1,4]naphthohydroquinone. A dose-response relationship was observed with 250 μM of *cytMycc1* causing 4-fold reduction in rate of oxygen consumption after subtracting background activity.

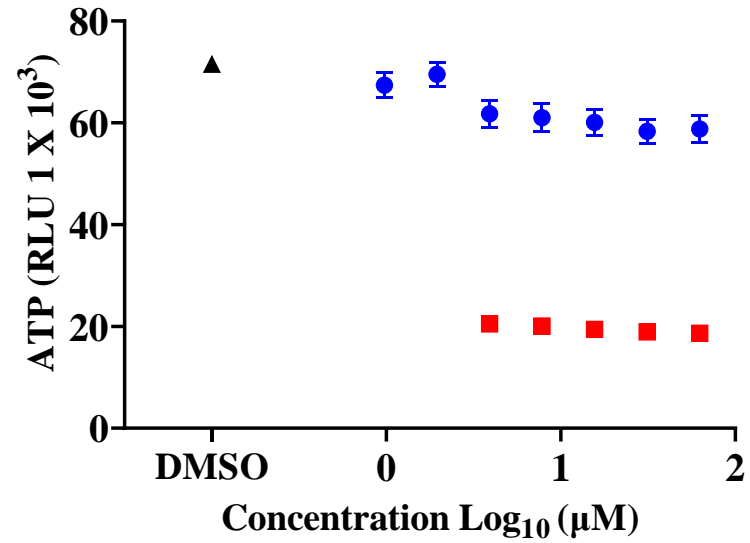

**Supplementary Figure 8.** Activity of *cytMycc1* in *E. coli* wildtype inverted membrane vesicles (IMVs). The IMVs were treated with a dose-range of *cytMycc1* (blue circles) and potassium cyanide (KCN; red squares) for 50 min before quantification of ATP levels. All experiments were performed in triplicate.
